# Supplementary material for: Total synthesis of (−)-(6R,11R,14S)-colletallol via proline catalyzed α-aminoxylation and Yamaguchi macrolactonization
Source: Royal Society of Chemistry journal article supplement (doi:10.1039/c6ra08484b), 2016-01-01
Supplement: c6ra08484b1.pdf [file c6ra08484b1.pdf]

**Total synthesis of (–)-(6*R*,11*R*,14*S*)-colletalol via proline catalyzed  
α-aminoxylation and Yamaguchi macrolactonization**

**Shruti Vandana Kauloorkar <sup>a</sup>**

**and Pradeep Kumar<sup>a\*</sup>**

Division of Organic Chemistry, CSIR-National  
Chemical Laboratory, Pune 411008, India.

\*Corresponding Author: Telephone number: +91-20  
25902627, Fax number: +91-20-25902629;  
e-mail address: [pk.tripathi@ncl.res.in](mailto:pk.tripathi@ncl.res.in)

## Table of contents

|                                                                      |              |
|----------------------------------------------------------------------|--------------|
| 1. <sup>1</sup> H and <sup>13</sup> C spectra for compound <b>9</b>  | <b>3</b>     |
| 2. <sup>1</sup> H and <sup>13</sup> C spectra for compound <b>10</b> | <b>4</b>     |
| 3. <sup>1</sup> H and <sup>13</sup> C spectra for compound <b>12</b> | <b>5</b>     |
| 4. <sup>1</sup> H and <sup>13</sup> C spectra for compound <b>13</b> | <b>6</b>     |
| 5. <sup>1</sup> H and <sup>13</sup> C spectra for compound <b>14</b> | <b>7</b>     |
| 6. <sup>1</sup> H and <sup>13</sup> C spectra for compound <b>15</b> | <b>8</b>     |
| 7. <sup>1</sup> H and <sup>13</sup> C spectra for compound <b>16</b> | <b>9</b>     |
| 8. <sup>1</sup> H and <sup>13</sup> C spectra for compound <b>17</b> | <b>10</b>    |
| 9. <sup>1</sup> H and <sup>13</sup> C spectra for compound <b>18</b> | <b>11</b>    |
| 10. <sup>1</sup> H and <sup>13</sup> C spectra for compound <b>3</b> | <b>12</b>    |
| 11. HPLC                                                             | <b>13-18</b> |

Ethyl (*R,E*)-5-((*tert*-butyldimethylsilyl)oxy)hex-2-enoate(9):

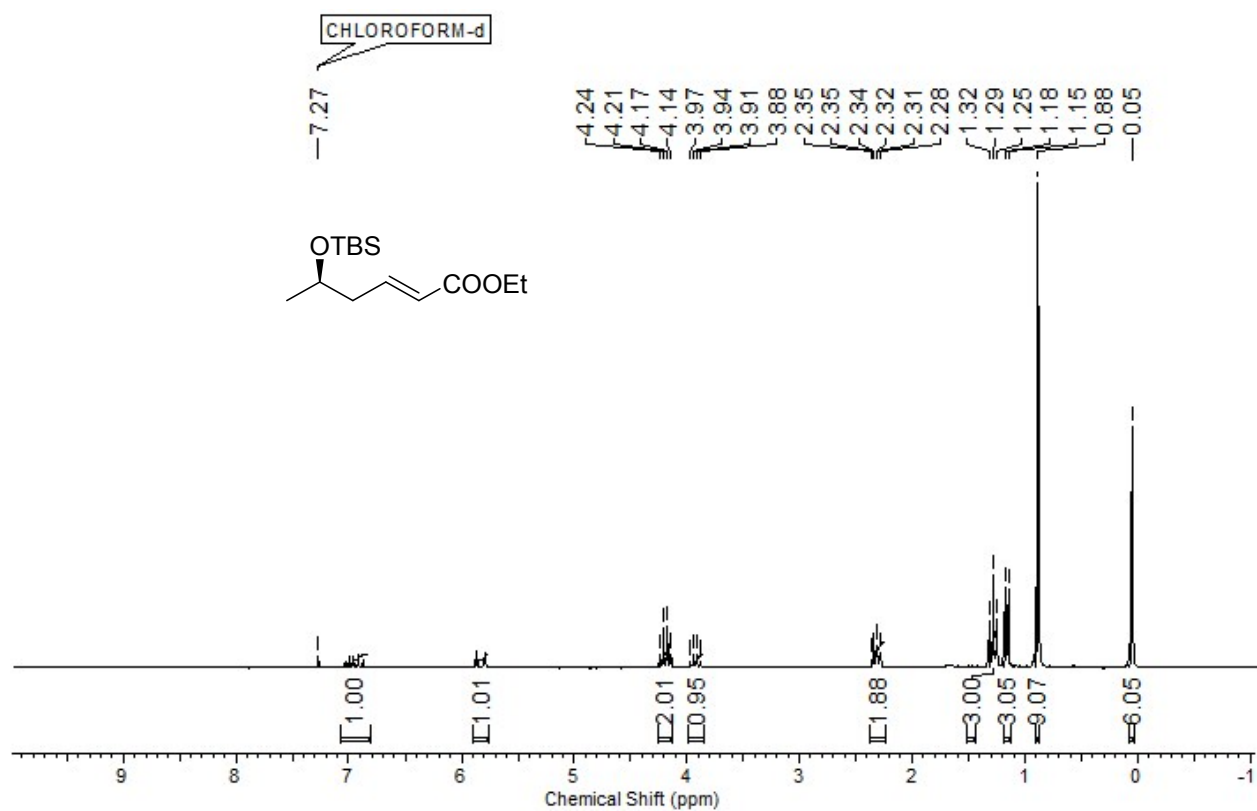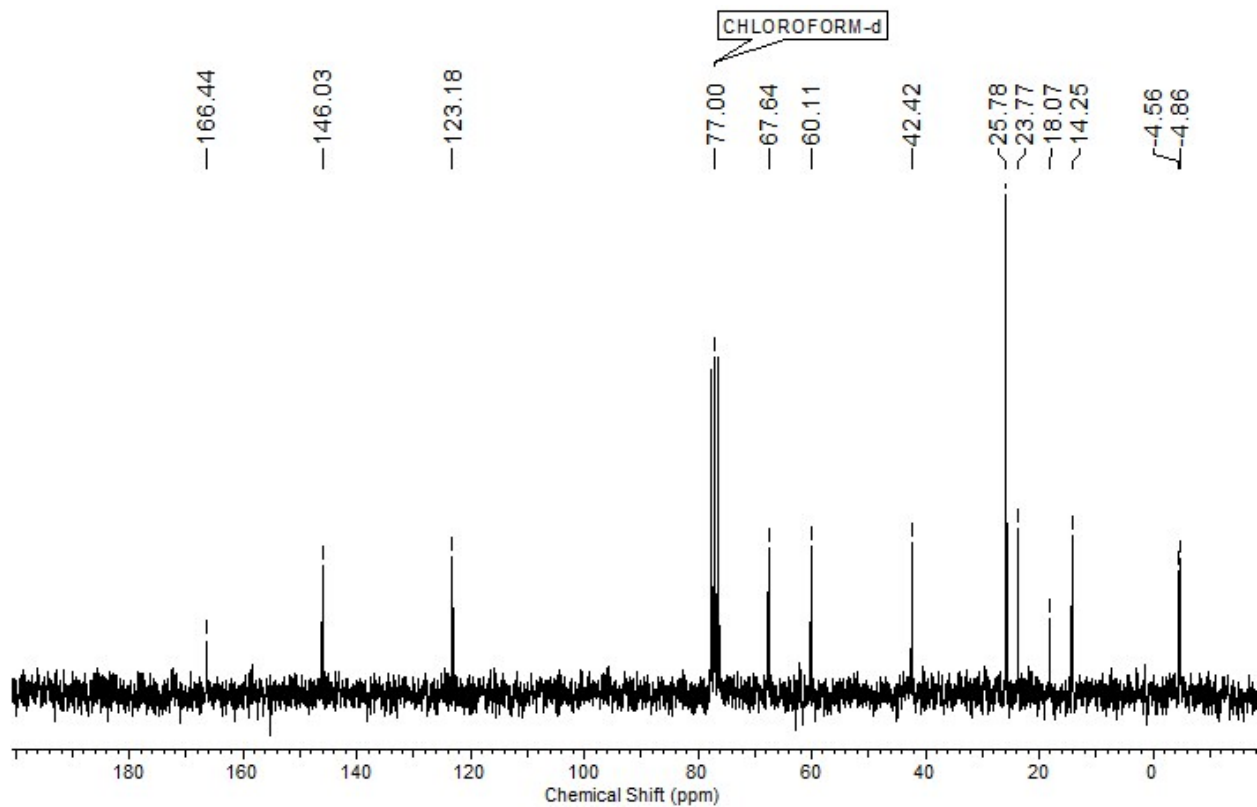

**(*R,E*)-5-((*tert*-butyldimethylsilyl)oxy)hex-2-enoic acid(10) :**

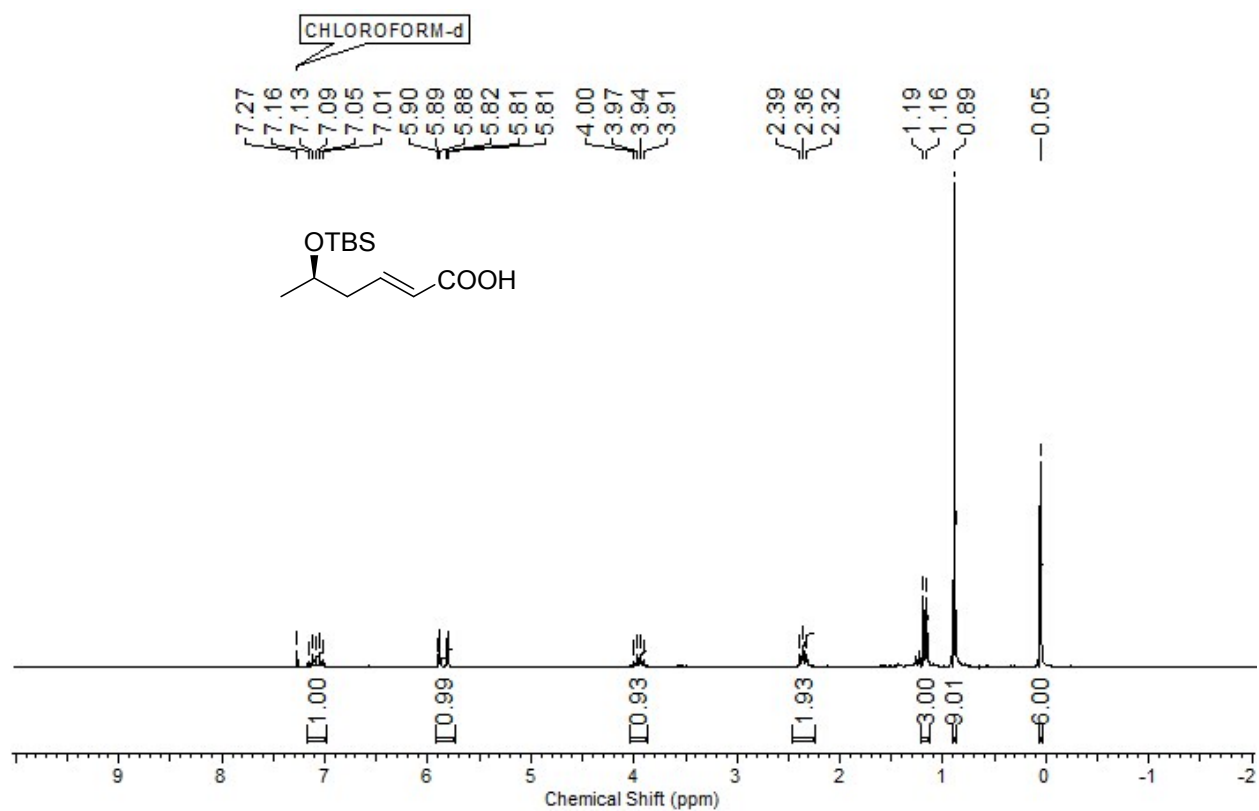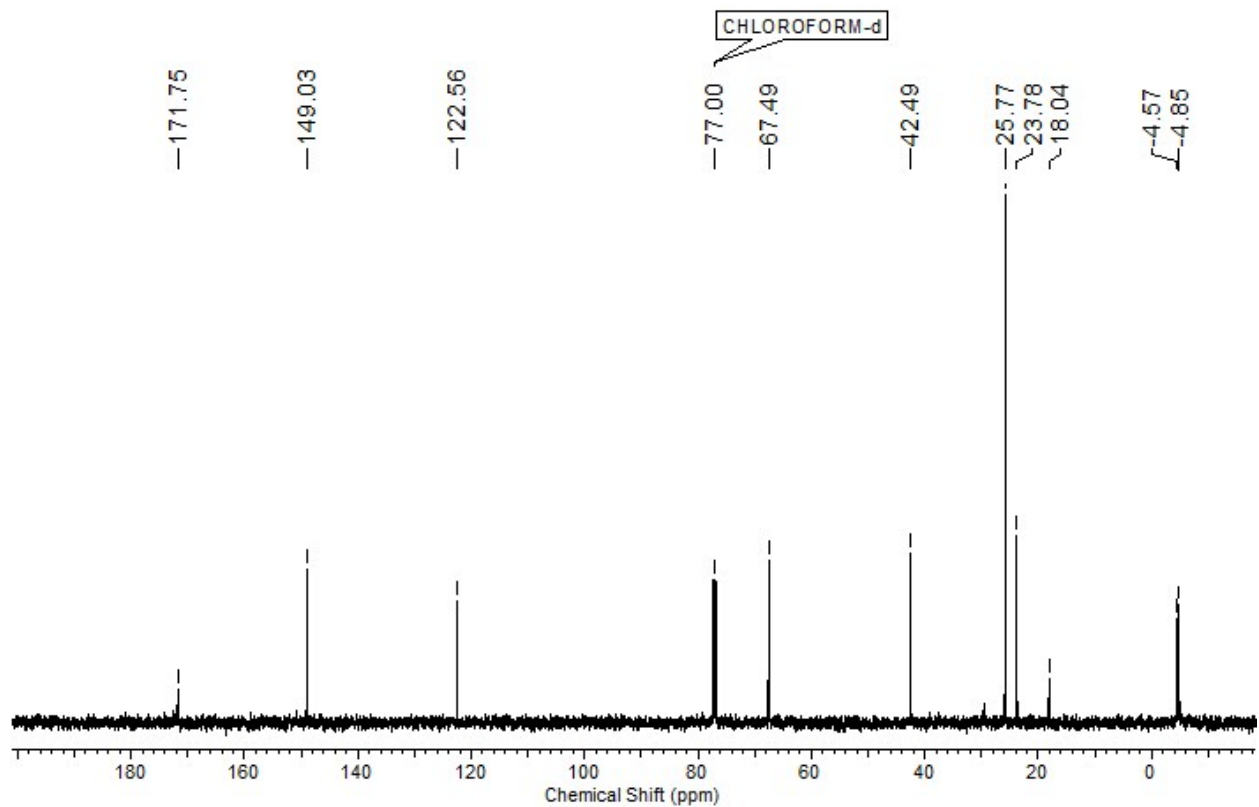

**Ethyl (4*R*,7*S*,*E*)-7-((*tert*-butyldimethylsilyl)oxy)-4-hydroxyoct-2-enoate(12):**

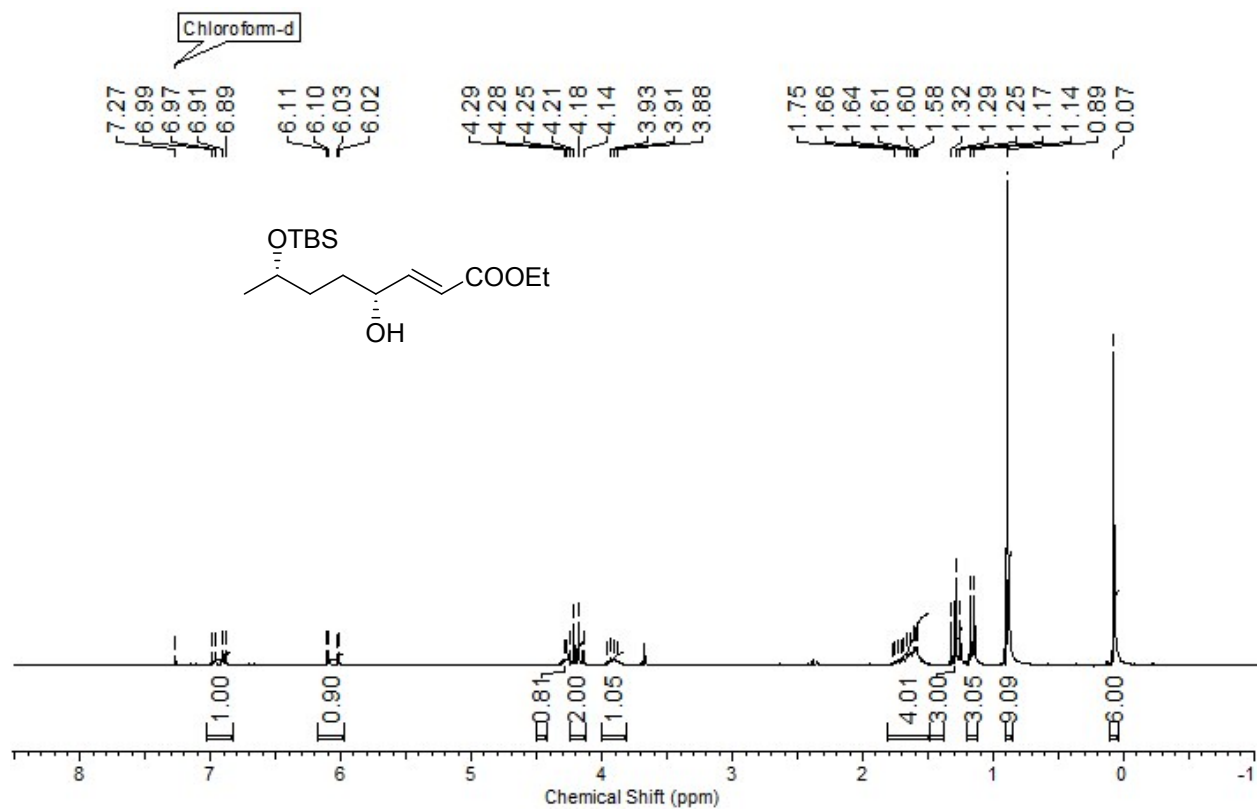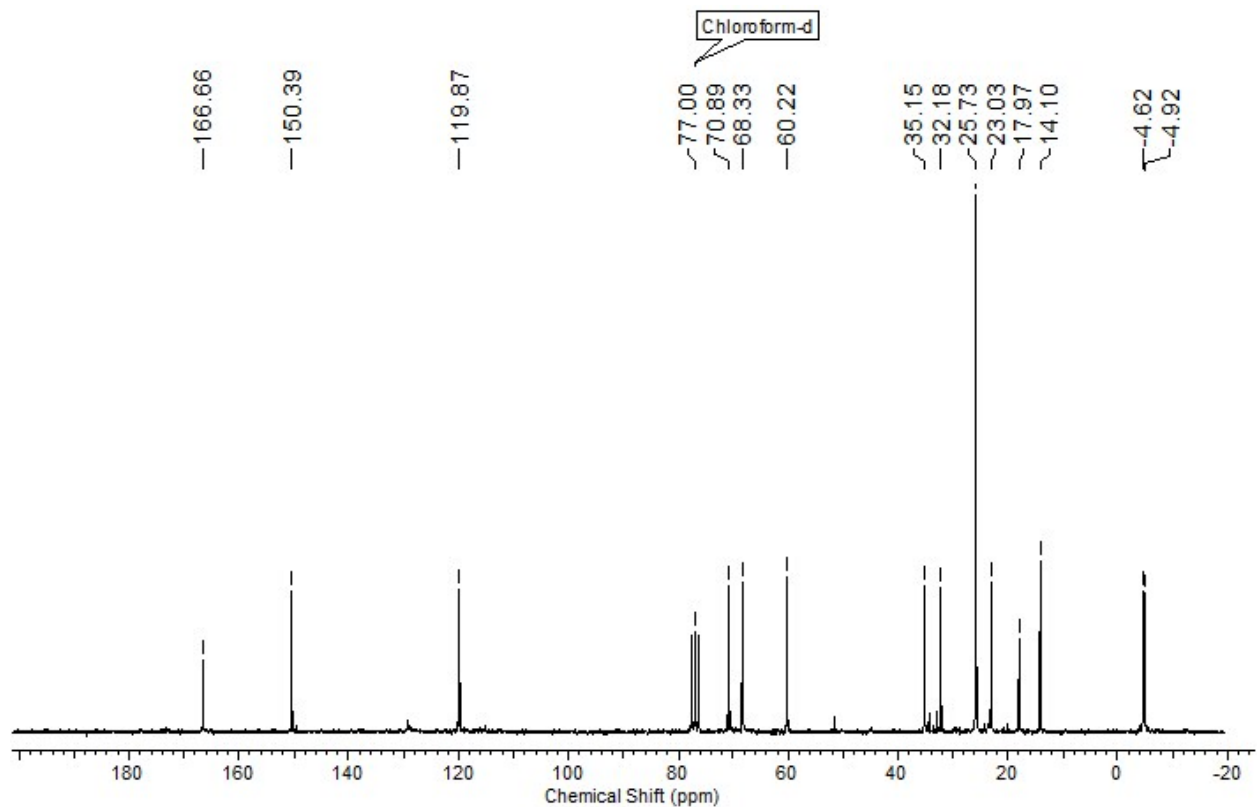

Ethyl (4*R*,7*S*,*E*)-7-((*tert*-butyldimethylsilyl)oxy)-4-((*tert*-butyldiphenylsilyl)oxy)oct-2-enoate(13):

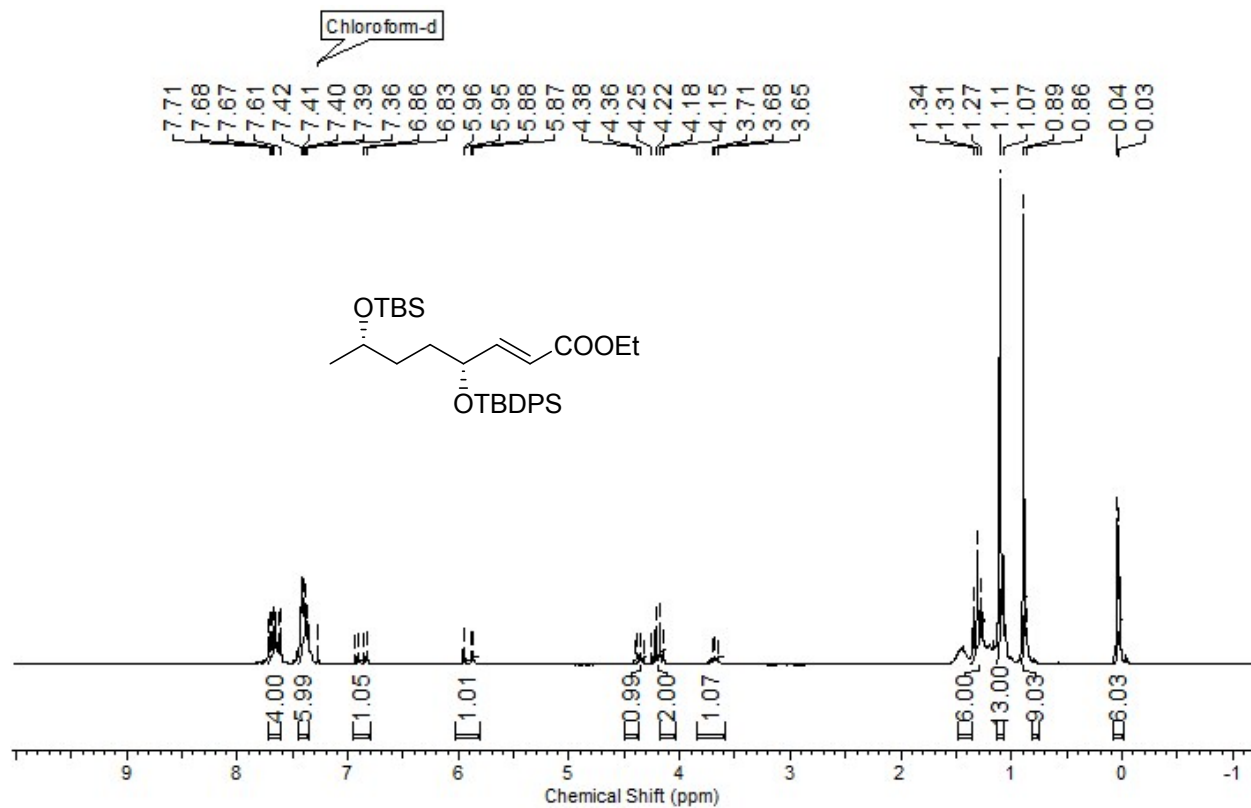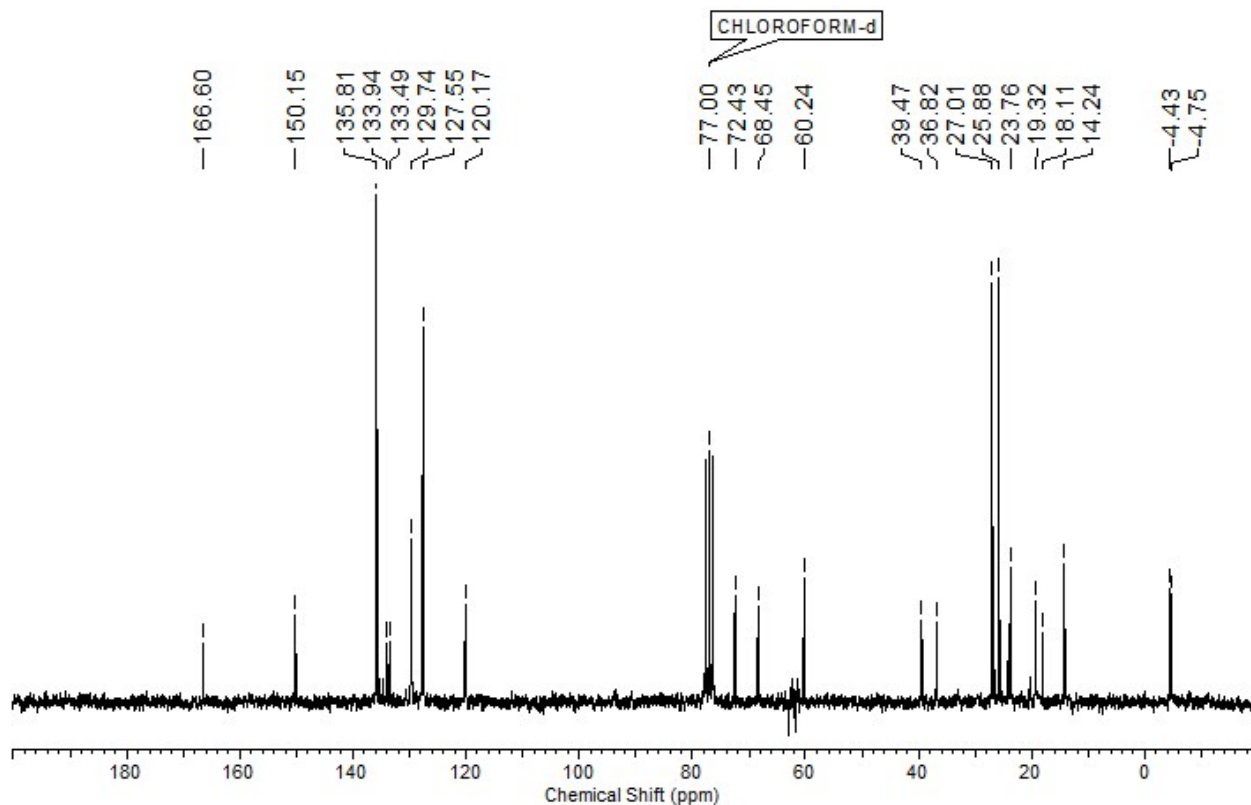

**Ethyl (4*R*,7*S*,*E*)-4-((*tert*-butyldiphenylsilyl)oxy)-7-hydroxyoct-2-enoate (14):**

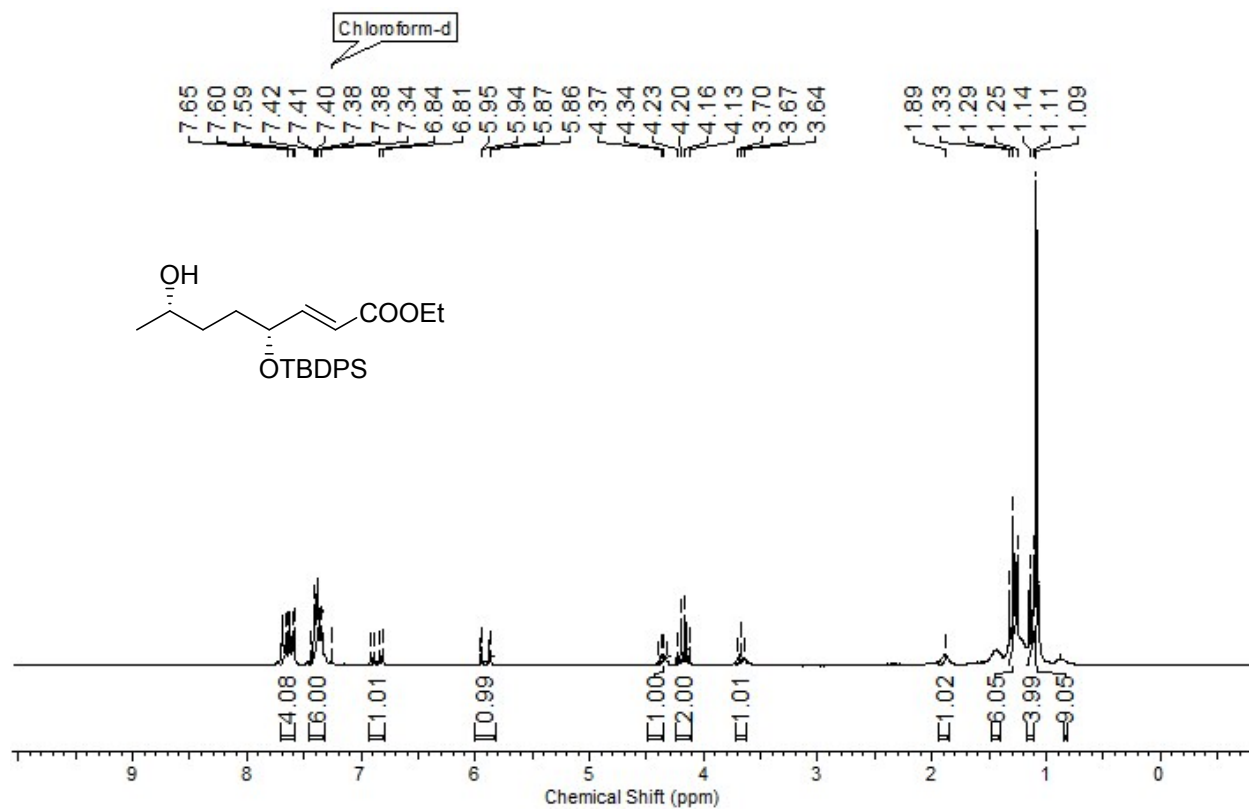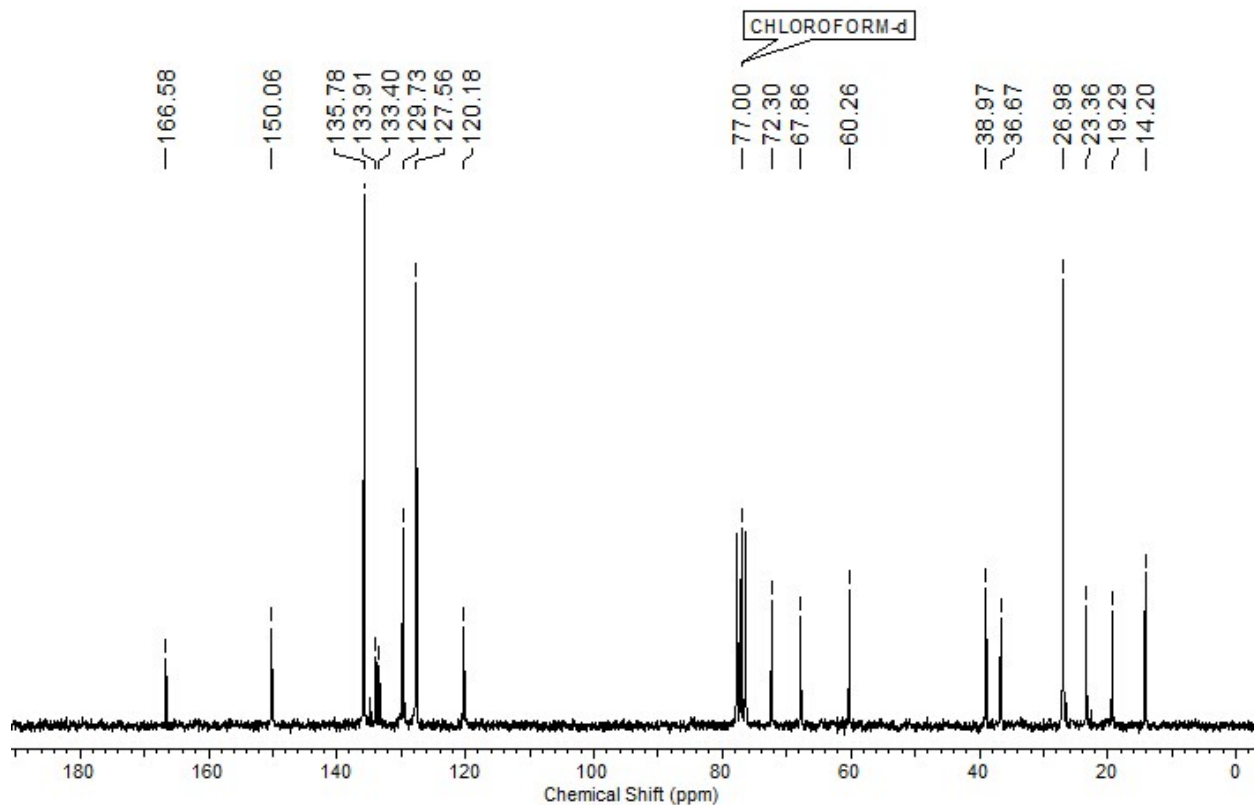

Ethyl (4*R*,7*S*,*E*)-7-(((*R*,*E*)-5-((*tert*-butyldimethylsilyl)oxy)hex-2-enyl)oxy)-4-(((*tert*-butyldiphenylsilyl)oxy)oct-2-enoate (15):

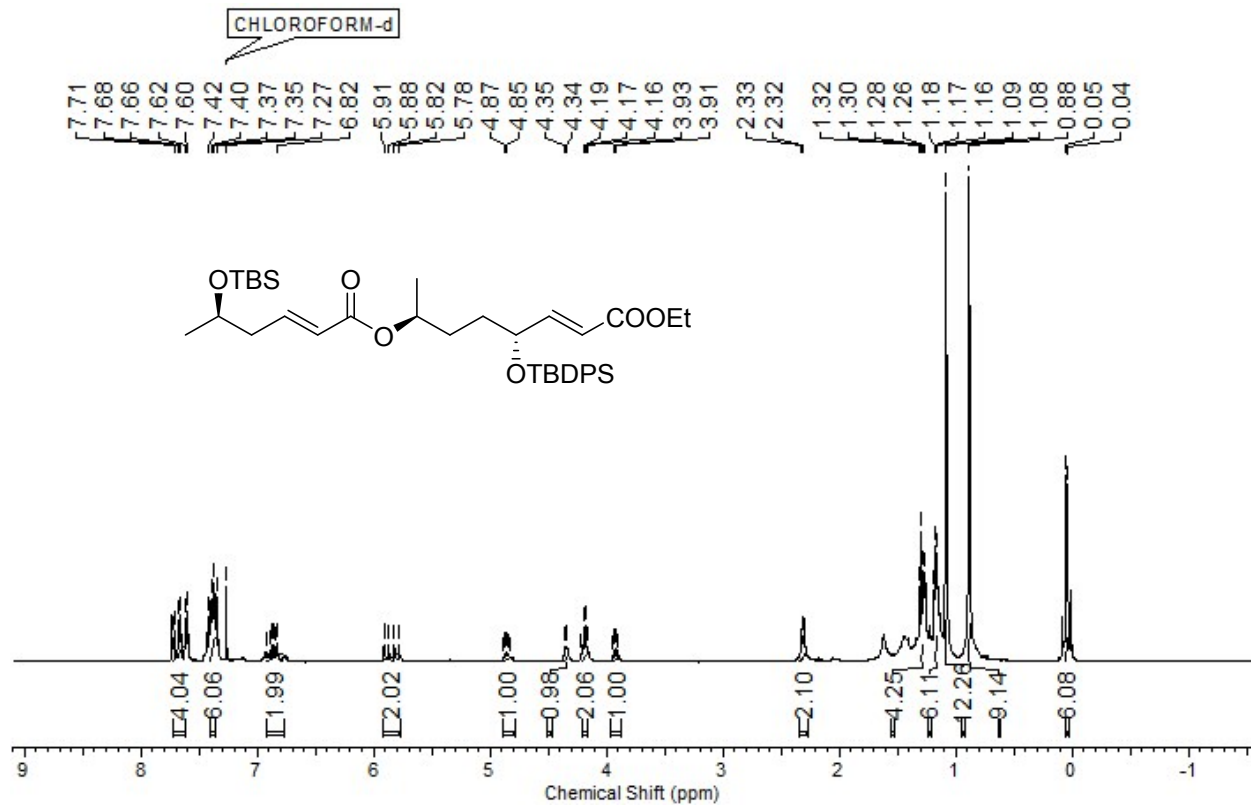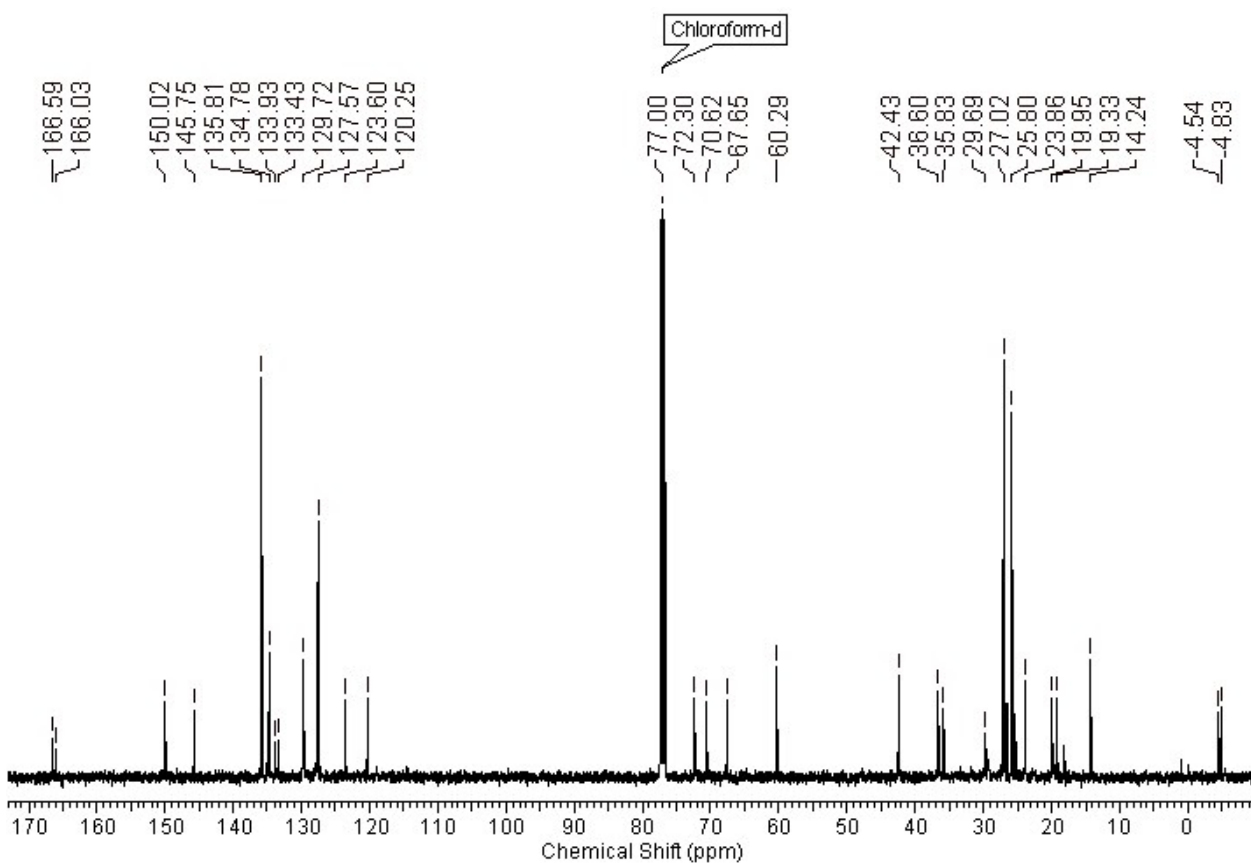



Ethyl (4*R*,7*S*,*E*)-4-((*tert*-butyldiphenylsilyloxy)-7-(((*R*,*E*)-5-hydroxyhex-2-enyl)oxy)oct-2-enoate (16):

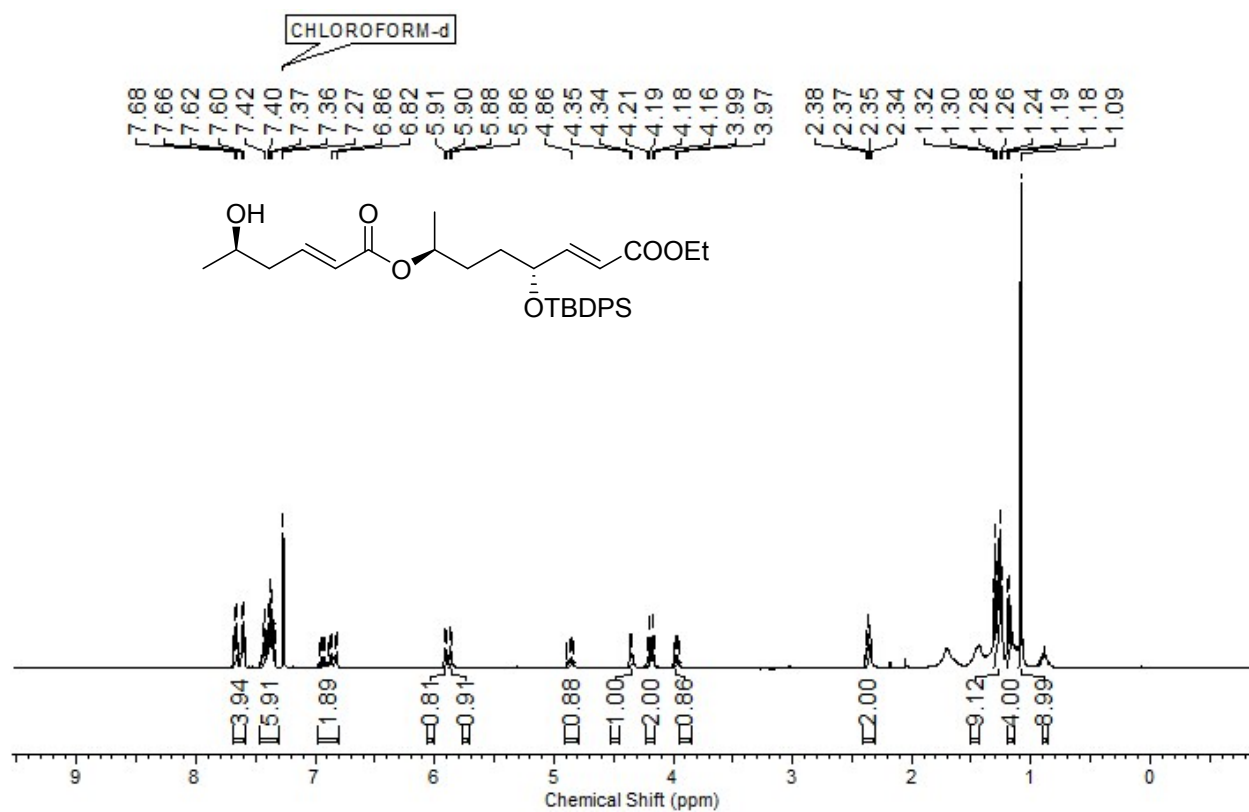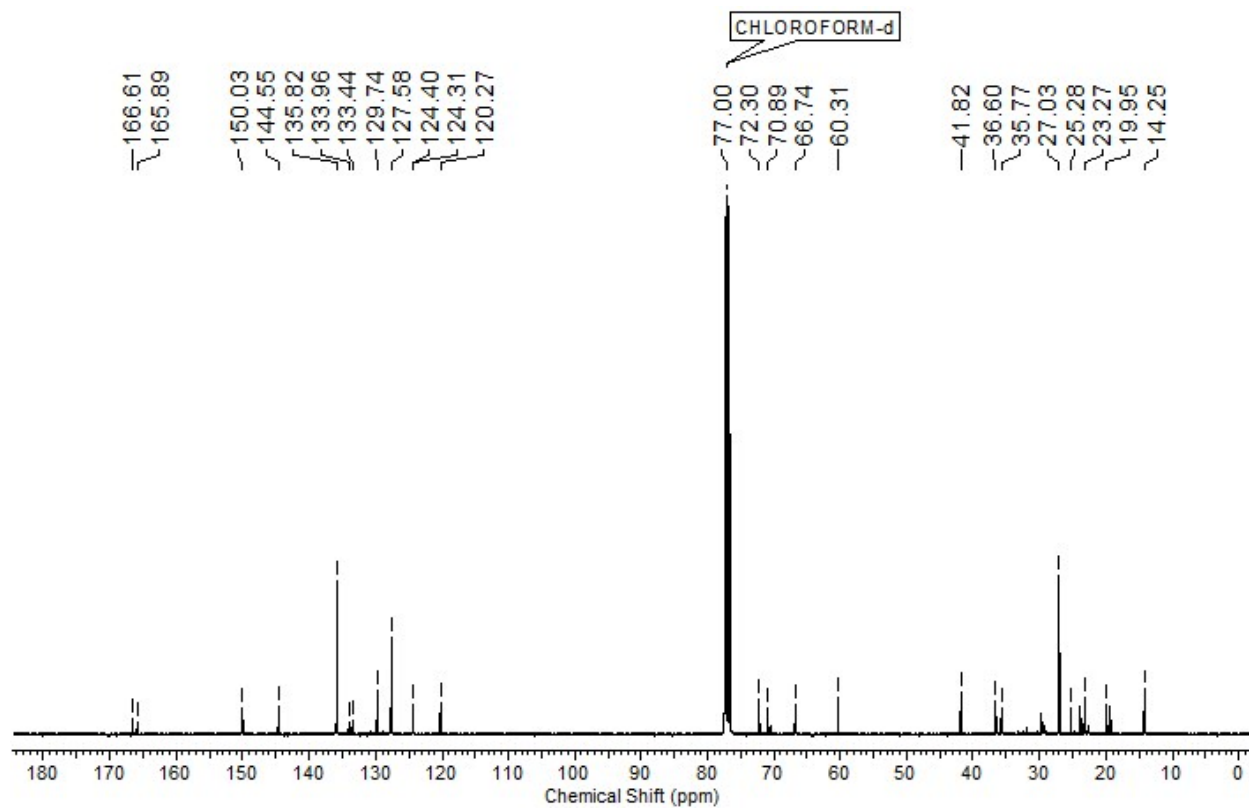

**(4*R*,7*S*,*E*)-4-((*tert*-butyldiphenylsilyl)oxy)-7-(((*R*,*E*)-5-hydroxyhex-2-enyl)oxy)oct-2-enoic acid (17):**

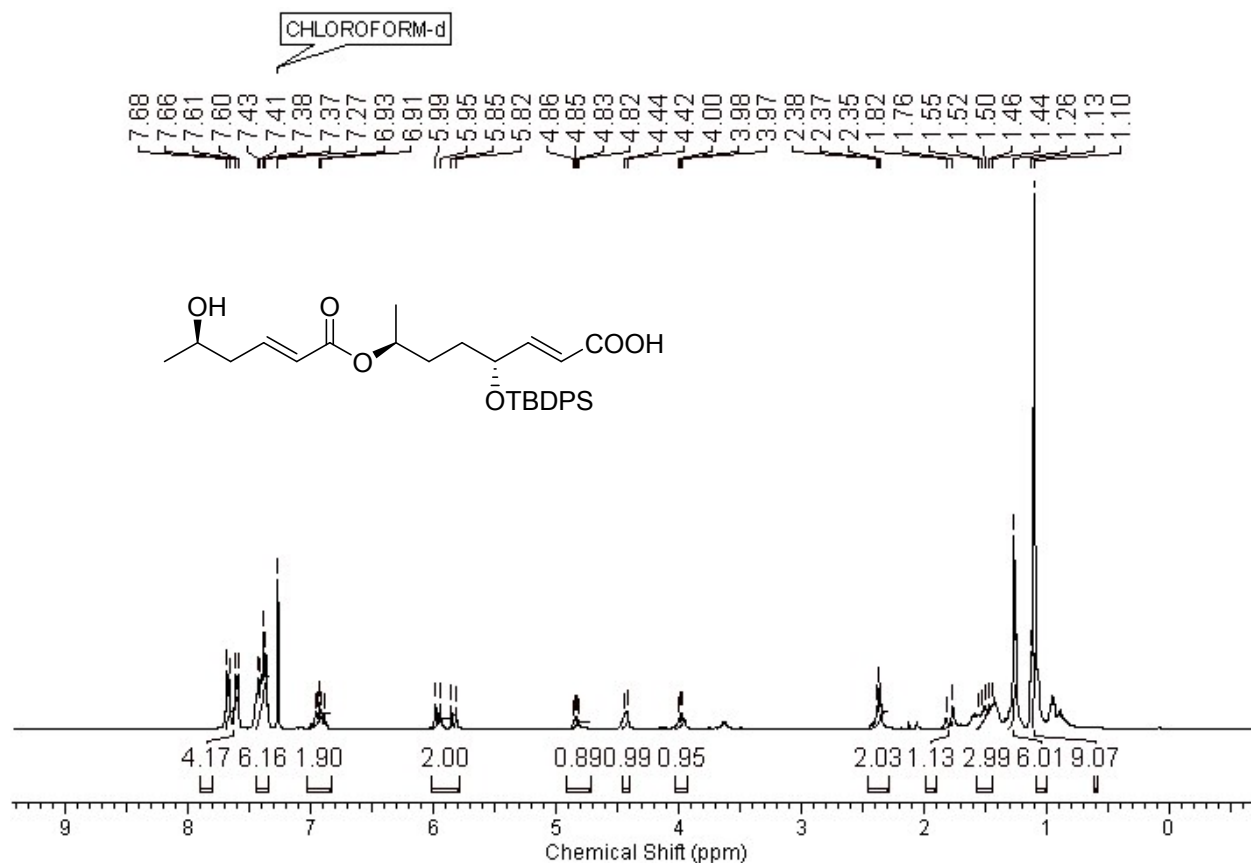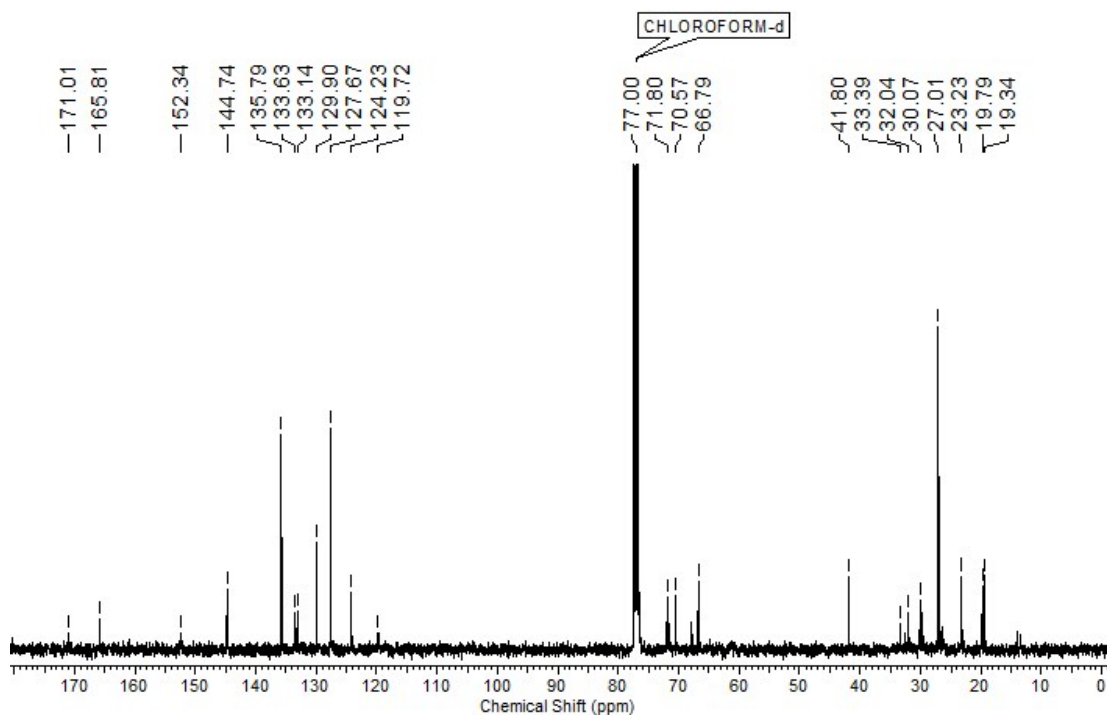

(3E,6R,9E,11R,14S)-11-((tert-butylidiphenylsilyloxy)-6,14-dimethyl-1,7-dioxacyclotetradeca-3,9-diene-2,8-dione (18):

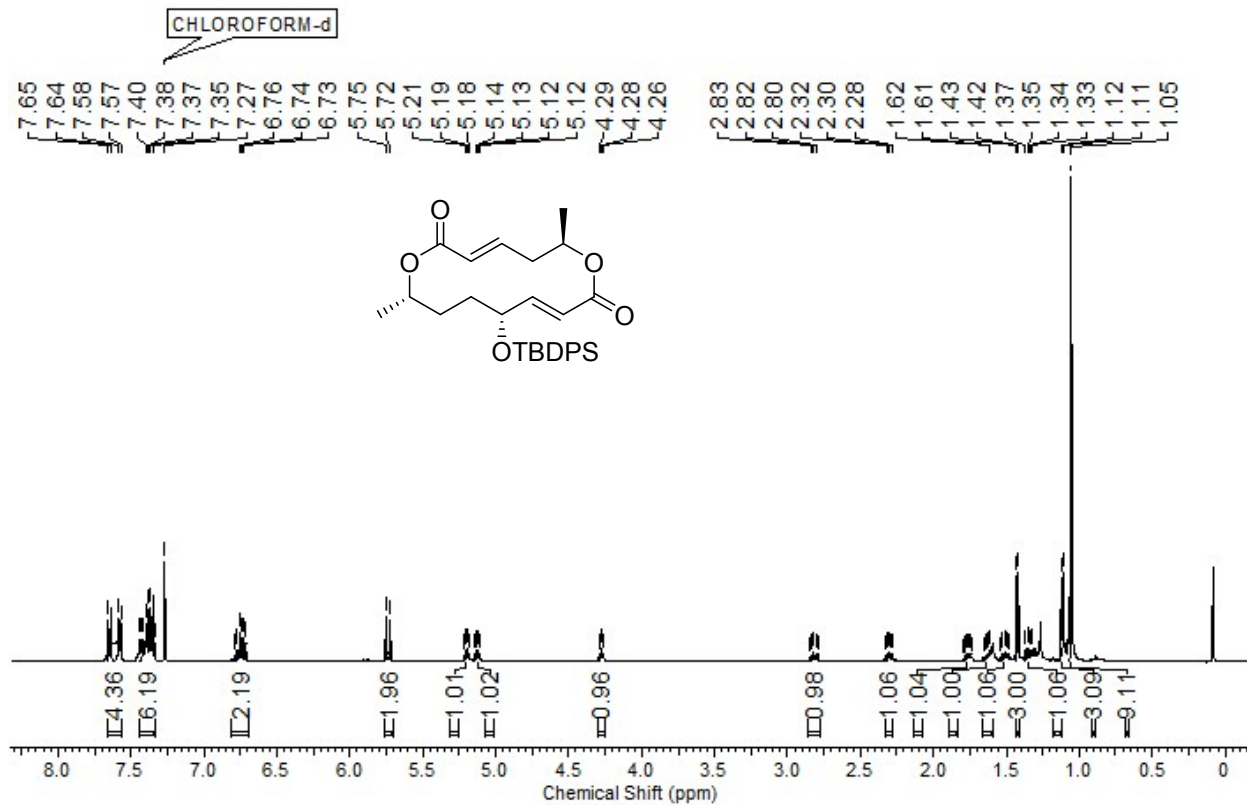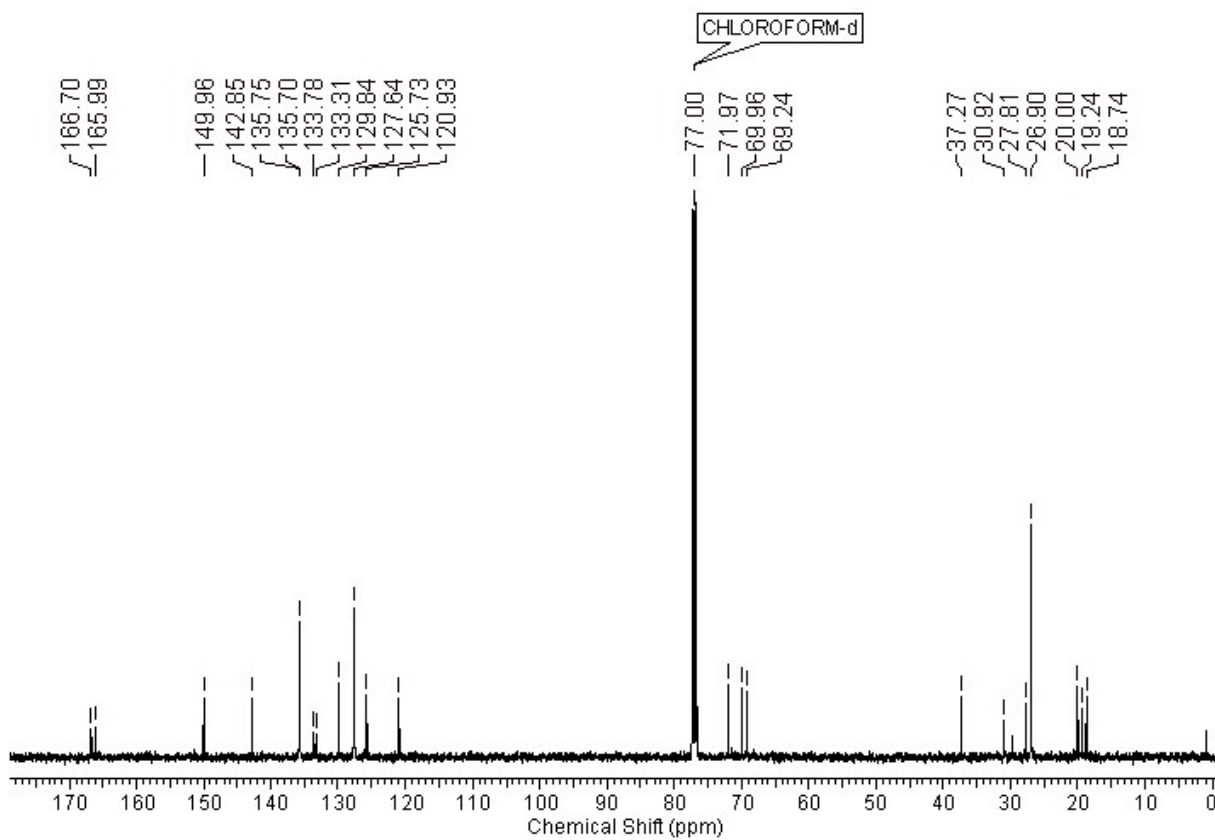

**(3E,6R,9E,11R,14S)-colletallol(3):**

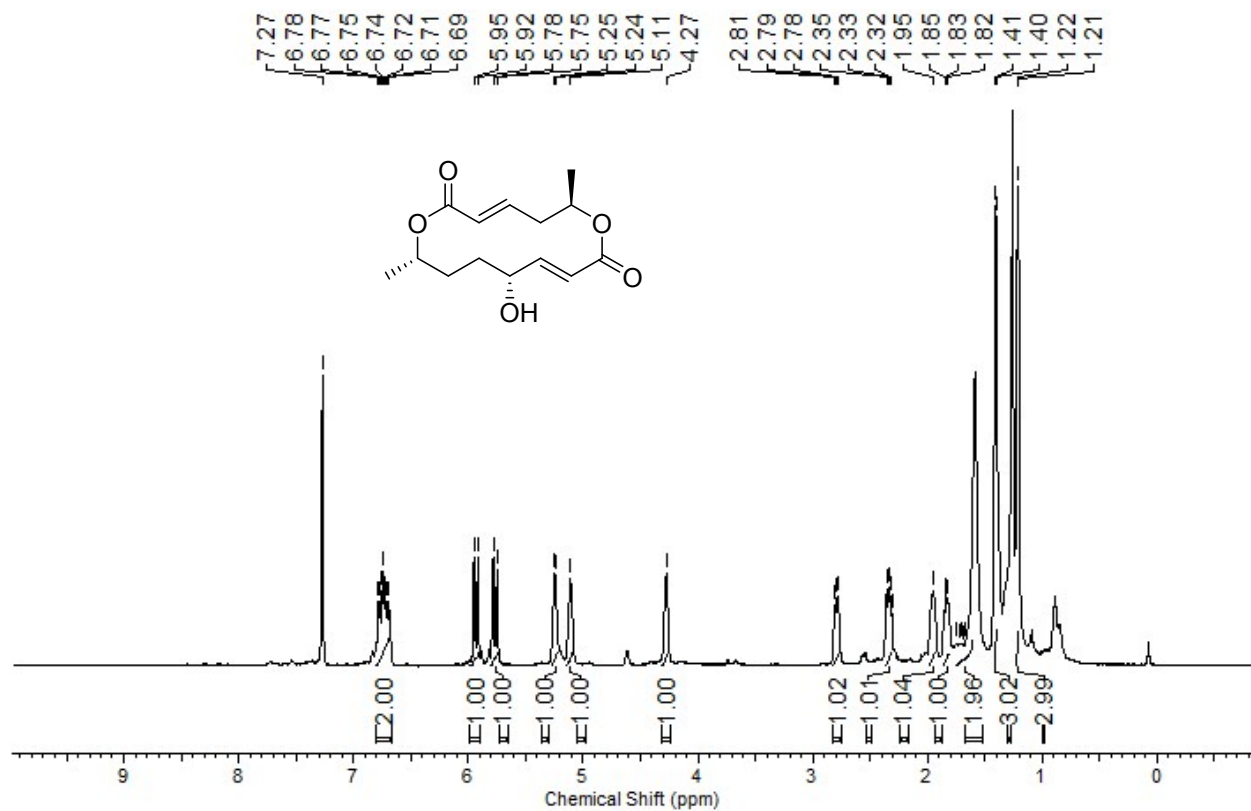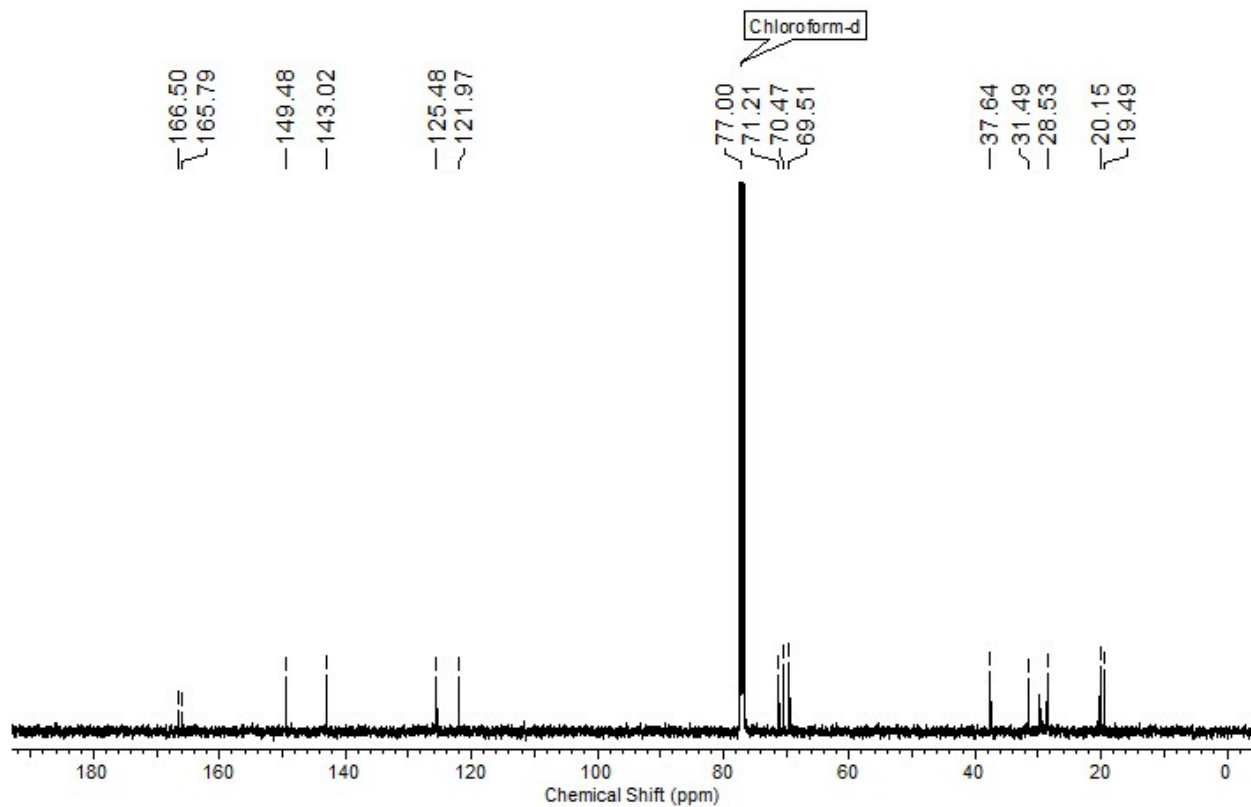

Chrom Type: HPLC Channel : 1

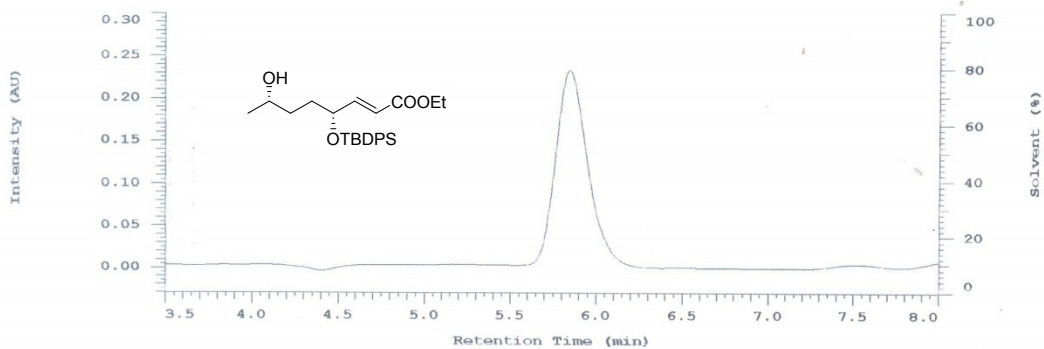

| No. | RT   | Height | Area    | Area %  |
|-----|------|--------|---------|---------|
| 1   | 5.85 | 115115 | 1488123 | 98.689  |
| 2   | 7.51 | 1540   | 19763   | 1.311   |
|     |      | 116655 | 1507886 | 100.000 |

Peak rejection level: 0

Group Leader :-Dr.Tripathi P.K.  
COLUMN :Kromasil Rp-8(150 X 4.6mm)  
MOBILE PHASE :-MEOH:H2O(75:25)  
WAVELENGTH :- 254nm  
FLOW RATE :- 1.0ml/min (1680 psi)  
SAMPLE CONC :-1mg/ml Injection vol: 20ul

Chrom Type: HPLC Channel : 1

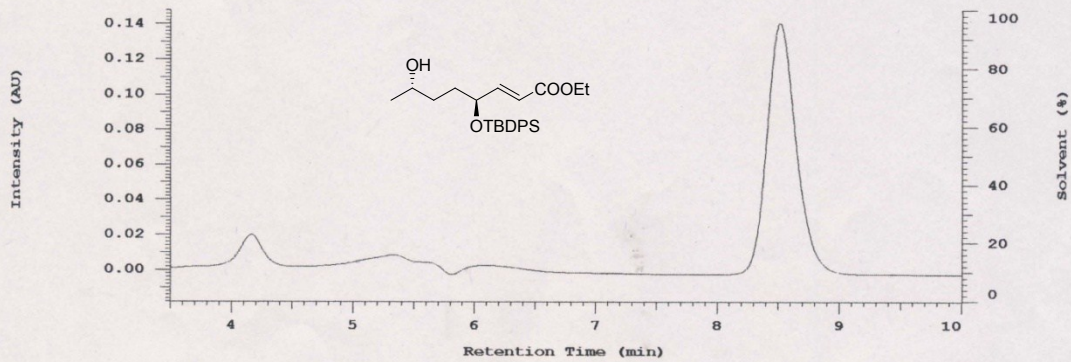

| No. | RT   | Height | Area    | Area %  |
|-----|------|--------|---------|---------|
| 1   | 6.11 | 1018   | 19323   | 1.653   |
| 2   | 8.52 | 70705  | 1149817 | 98.347  |
|     |      | 71723  | 1169140 | 100.000 |

Peak rejection level: 0

Group Leader :-Dr.Tripathi P.K.  
 COLUMN :Kromasil RP-8 (150 X 4.6mm)  
 MOBILE PHASE :-MEOH:H2O(75:25)  
 WAVELENGTH :- 254nm  
 FLOW RATE :- 1.0 ml/min (1680 psi)  
 SAMPLE CONC :-1 mg/ml Injection vol: 20ul



Chrom Type: HPLC Channel : 1

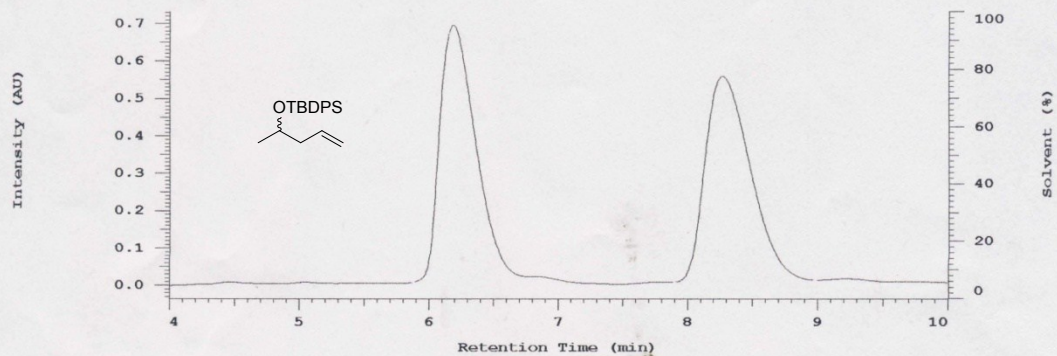

| No. | RT   | Height | Area     | Area %  |
|-----|------|--------|----------|---------|
| 1   | 6.19 | 340626 | 6524750  | 49.582  |
| 2   | 8.27 | 273862 | 6634765  | 50.418  |
|     |      | 614488 | 13159515 | 100.000 |

Peak rejection level: 0

Group Leader :-Dr.Tripathi P.K.  
COLUMN :Chiralcel OJ-RH (150 X 4.6mm)  
MOBILE PHASE :-MEOH:H2O(90:10)  
WAVELENGTH :- 254nm  
FLOW RATE :- 0.7 ml/min (740 psi)  
SAMPLE CONC :-1 mg/1ml Injection vol: 2ul

Chrom Type: HPLC Channel : 1

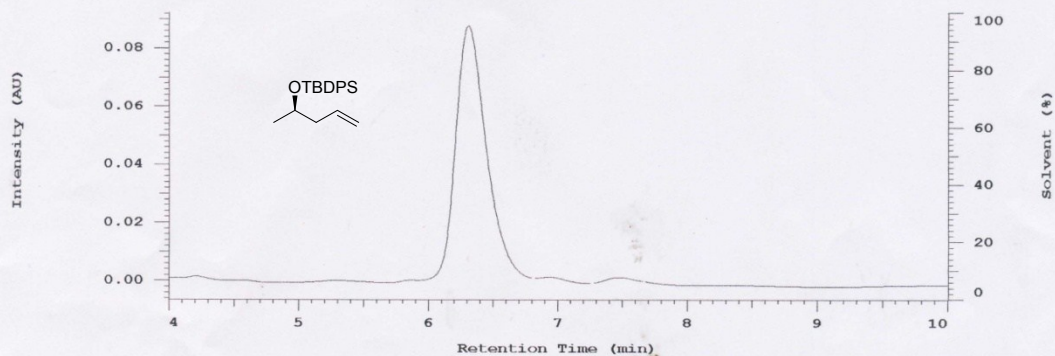

| No. | RT   | Height | Area   | Area %  |
|-----|------|--------|--------|---------|
| 1   | 6.31 | 43592  | 713048 | 98.374  |
| 2   | 7.48 | 876    | 11788  | 1.626   |
|     |      | 44468  | 724836 | 100.000 |

Peak rejection level: 0

Group Leader :-Dr.Tripathi P.K.  
COLUMN :Chiralcel OJ-RH (150 X 4.6mm)  
MOBILE PHASE :-MEOH:H2O(90:10)  
WAVELENGTH :- 254nm  
FLOW RATE :- 0.7 ml/min (740 psi)  
SAMPLE CONC :-1 mg/ml Injection vol: 2ul



Chrom Type: HPLC Channel : 1

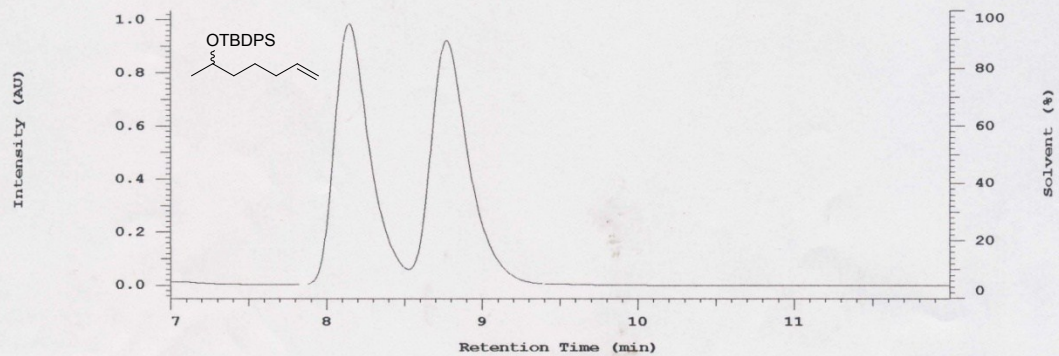

| No. | RT   | Height | Area     | Area %  |
|-----|------|--------|----------|---------|
| 1   | 8.14 | 490017 | 7753344  | 49.671  |
| 2   | 8.77 | 458354 | 7855972  | 50.329  |
|     |      | 948371 | 15609316 | 100.000 |

Peak rejection level: 0

Group Leader :-Dr.Tripathi P.K.  
 COLUMN :Chiralcel OJ-RH (150 X 4.6mm)  
 MOBILE PHASE :-MEOH:H2O(90:10)  
 WAVELENGTH :- 230nm  
 FLOW RATE :- 0.7 ml/min (740 psi)  
 SAMPLE CONC :-X mg/ml Injection vol: 2ul

Chrom Type: HPLC Channel : 1

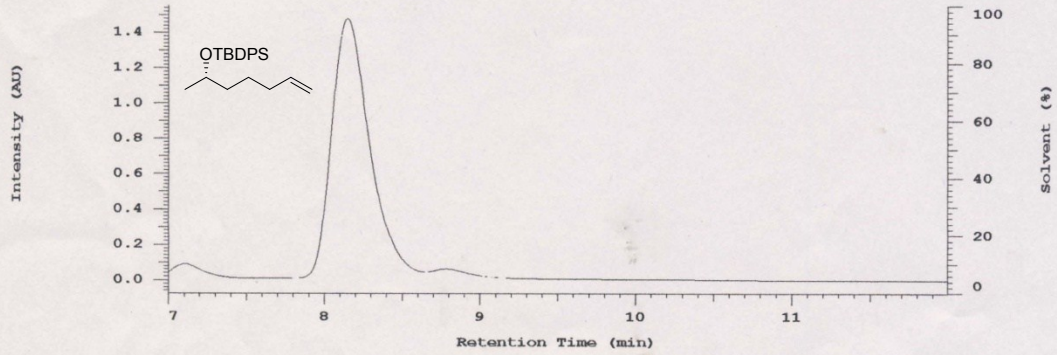

| No. | RT   | Height | Area     | Area %  |
|-----|------|--------|----------|---------|
| 1   | 8.15 | 732649 | 12806862 | 98.749  |
| 2   | 8.79 | 13131  | 162284   | 1.251   |
|     |      | 745780 | 12969146 | 100.000 |

Peak rejection level: 0

Group Leader :-Dr.Tripathi P.K.  
 COLUMN :Chiralcel OJ-RH (150 X 4.6mm)  
 MOBILE PHASE :-MEOH:H2O(90:10)  
 WAVELENGTH :- 230nm  
 FLOW RATE :- 0.7 ml/min (740 psi)  
 SAMPLE CONC :-X mg/lml Injection vol: 2ul
